# Supplementary material for: Electronic properties of amino acids and nucleobases: similarity classes and pairing principles from chemical reactivity indices
Source: Royal Society of Chemistry journal article supplement (doi:10.1039/d2cp02767d), 2022-01-01
Supplement: d2cp02767d1.pdf [file d2cp02767d1.pdf]

**SUPPORTING INFORMATION:**

**Electronic Properties of Amino Acids and  
Nucleobases: Similarity Classes and Pairing  
Principles from Chemical Reactivity Indices**

Ramón Alain Miranda-Quintana<sup>\*,†</sup> and Jens Smiatek<sup>\*,‡</sup>

*†Department of Chemistry and Quantum Theory Project, University of Florida, FL 32611,  
USA*

*‡Institute for Computational Physics, University of Stuttgart, D-70569 Stuttgart, Germany*

E-mail: quintana@chem.ufl.edu; smiatek@icp.uni-stuttgart.de

# 1. Amino Acids: Chemical Reactivity Indices for Individual Classes

Table 1: Mean, maximum and minimum values of the electronegativity  $\chi$ , the chemical hardness  $\eta$  and the electronphilicity  $\omega$  for the individual amino acid classes  $he^+$ ,  $me^0$ ,  $me^+$  and  $se^-$ . The values for the amino acids MET and TRP which are not part of any class are also shown.

| Property               | $he^+$ | $me^0$ | $me^+$ | $se^-$ | MET  | TRP  |
|------------------------|--------|--------|--------|--------|------|------|
| $\langle\chi\rangle$   | 2.85   | 3.17   | 2.59   | 3.48   | 2.83 | 3.30 |
| $\chi_{\min}$          | 2.68   | 3.08   | 2.54   | 3.47   | –    | –    |
| $\chi_{\max}$          | 2.98   | 3.30   | 2.65   | 3.49   | –    | –    |
| $\langle\eta\rangle$   | 5.34   | 4.85   | 4.79   | 4.16   | 4.47 | 3.70 |
| $\eta_{\min}$          | 5.17   | 4.58   | 4.73   | 4.02   | –    | –    |
| $\eta_{\max}$          | 5.47   | 4.99   | 4.84   | 4.30   | –    | –    |
| $\langle\omega\rangle$ | 0.75   | 1.04   | 0.70   | 1.45   | 0.89 | 1.47 |
| $\omega_{\min}$        | 0.69   | 0.96   | 0.67   | 1.41   | –    | –    |
| $\omega_{\max}$        | 0.85   | 1.18   | 0.74   | 1.50   | –    | –    |

## 2. Nucleobases: Chemical Reactivity Indices for Individual Classes

Table 2: Mean, maximum and minimum values of the electronegativity  $\chi$ , the chemical hardness  $\eta$  and the electrophilicity  $\omega$  for the individual nucleobase classes  $\text{Nse}^+$ ,  $\text{Nse}^0$  and  $\text{Nse}^-$ .

| Property               | $\text{Nse}^+$ | $\text{Nse}^0$ | $\text{Nse}^-$ |
|------------------------|----------------|----------------|----------------|
| $\langle\chi\rangle$   | 2.36           | 3.33           | 3.95           |
| $\chi_{\min}$          | –              | –              | 3.80           |
| $\chi_{\max}$          | –              | –              | 4.15           |
| $\langle\eta\rangle$   | 3.09           | 3.39           | 3.90           |
| $\eta_{\min}$          | –              | –              | 3.79           |
| $\eta_{\max}$          | –              | –              | 3.98           |
| $\langle\omega\rangle$ | 0.90           | 1.63           | 2.00           |
| $\omega_{\min}$        | –              | –              | 1.84           |
| $\omega_{\max}$        | –              | –              | 2.14           |

### 3. Transferred Charge between Amino Acids and Water Molecules

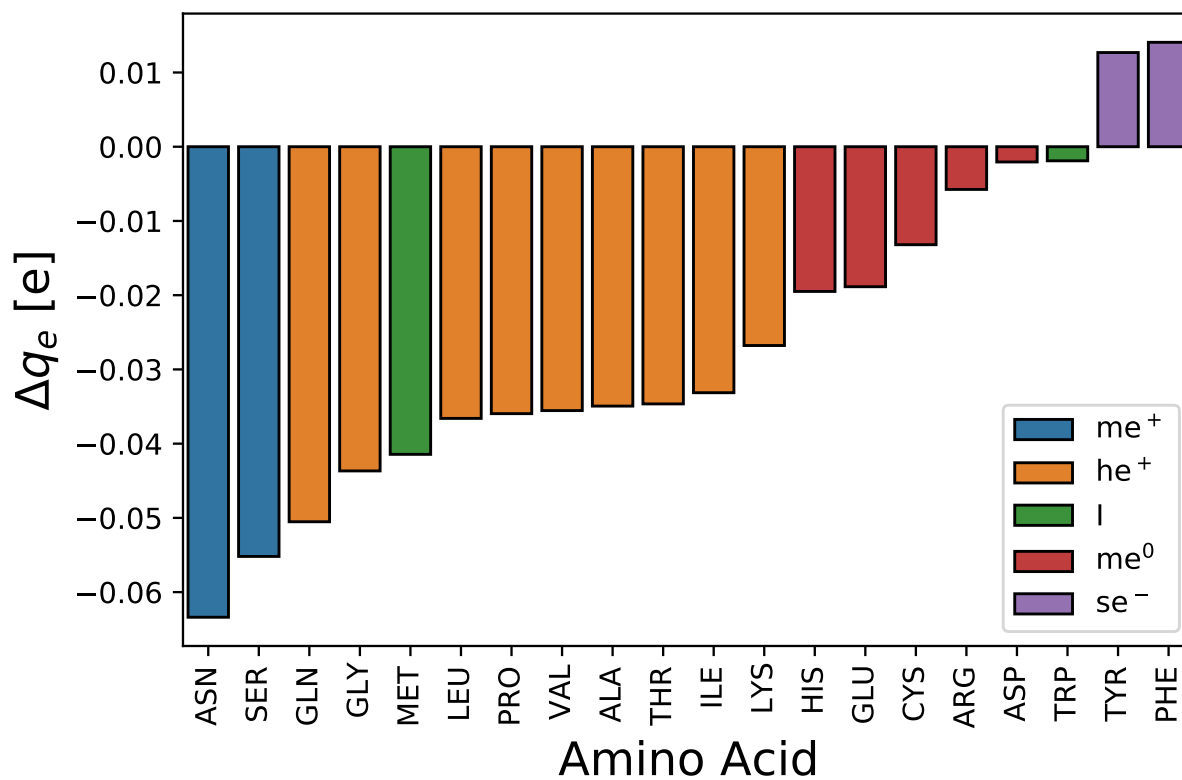

Figure 1: Transferred charge  $\Delta q_e$  between the amino acids and water molecules.

## 4. Interaction Energies for Amino Acids

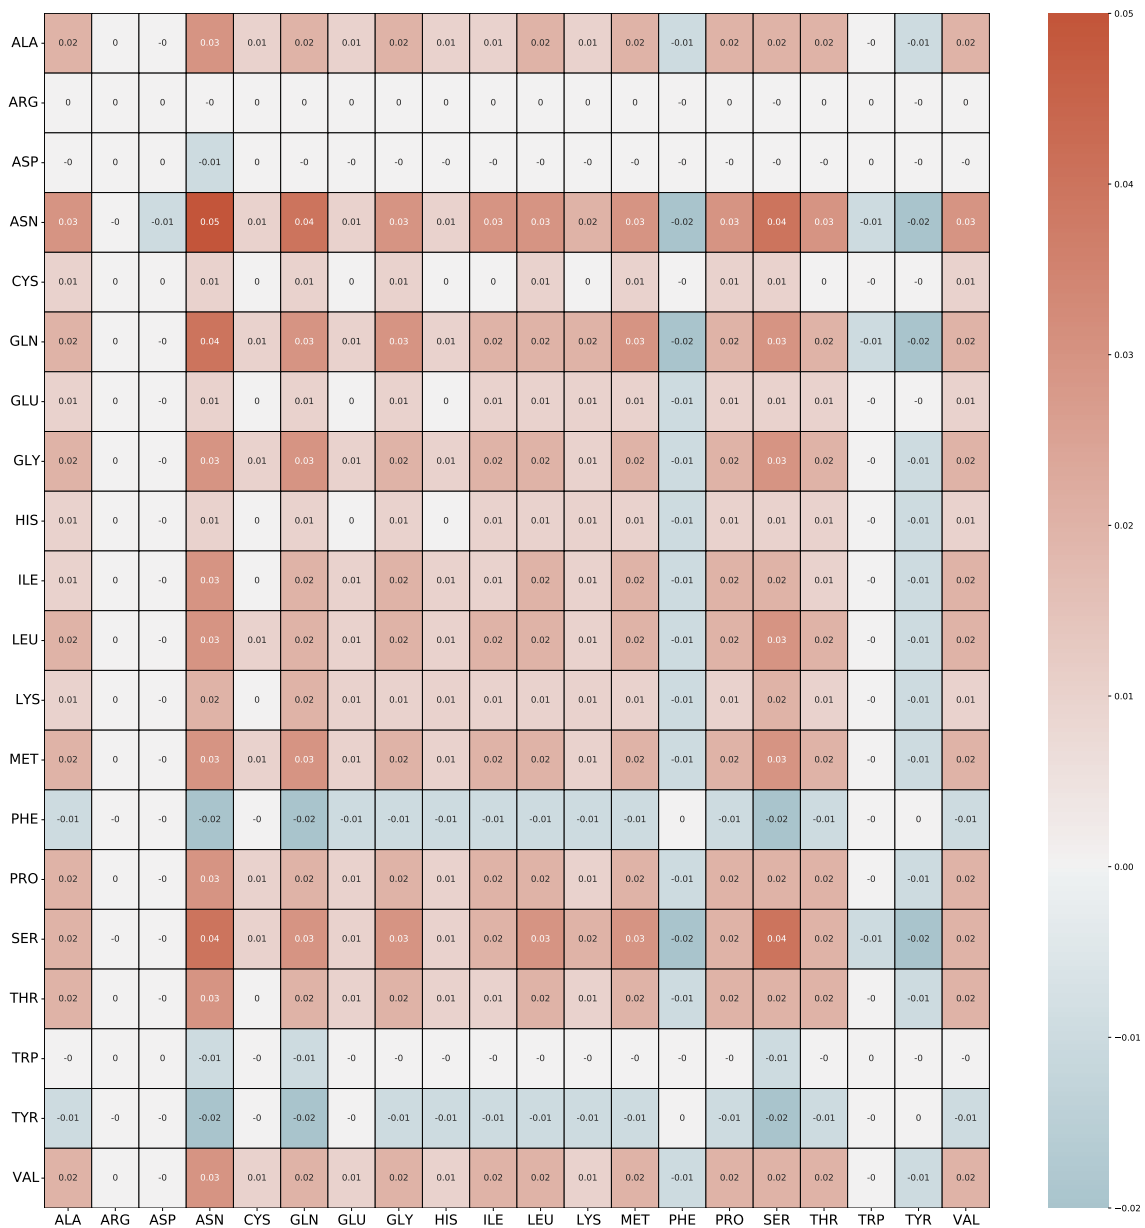

Figure 2: Heatmap of interaction energies  $\Delta\Delta E_s$  for all pairs of amino acids.

## 5. Electrophilicity Values for Nucleobase Pairs

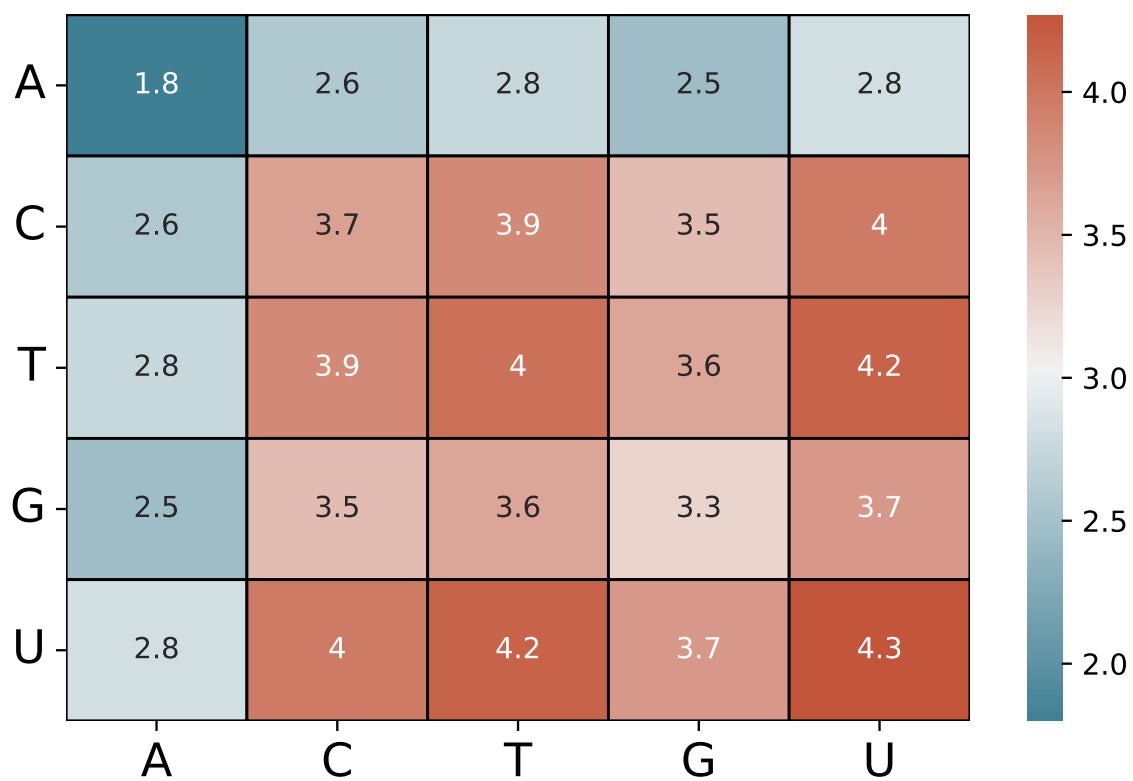

Figure 3: Heatmap of product electrophilicities  $\omega_{XY}$  for all pairs of nucleobases  $X$  and  $Y$ .
